# Supplementary material
Source: publisher site journal article supplement (https://www.dovepress.com/article/280174)
Supplement: Supplementary file 1 [file get_supplementary_file.php]

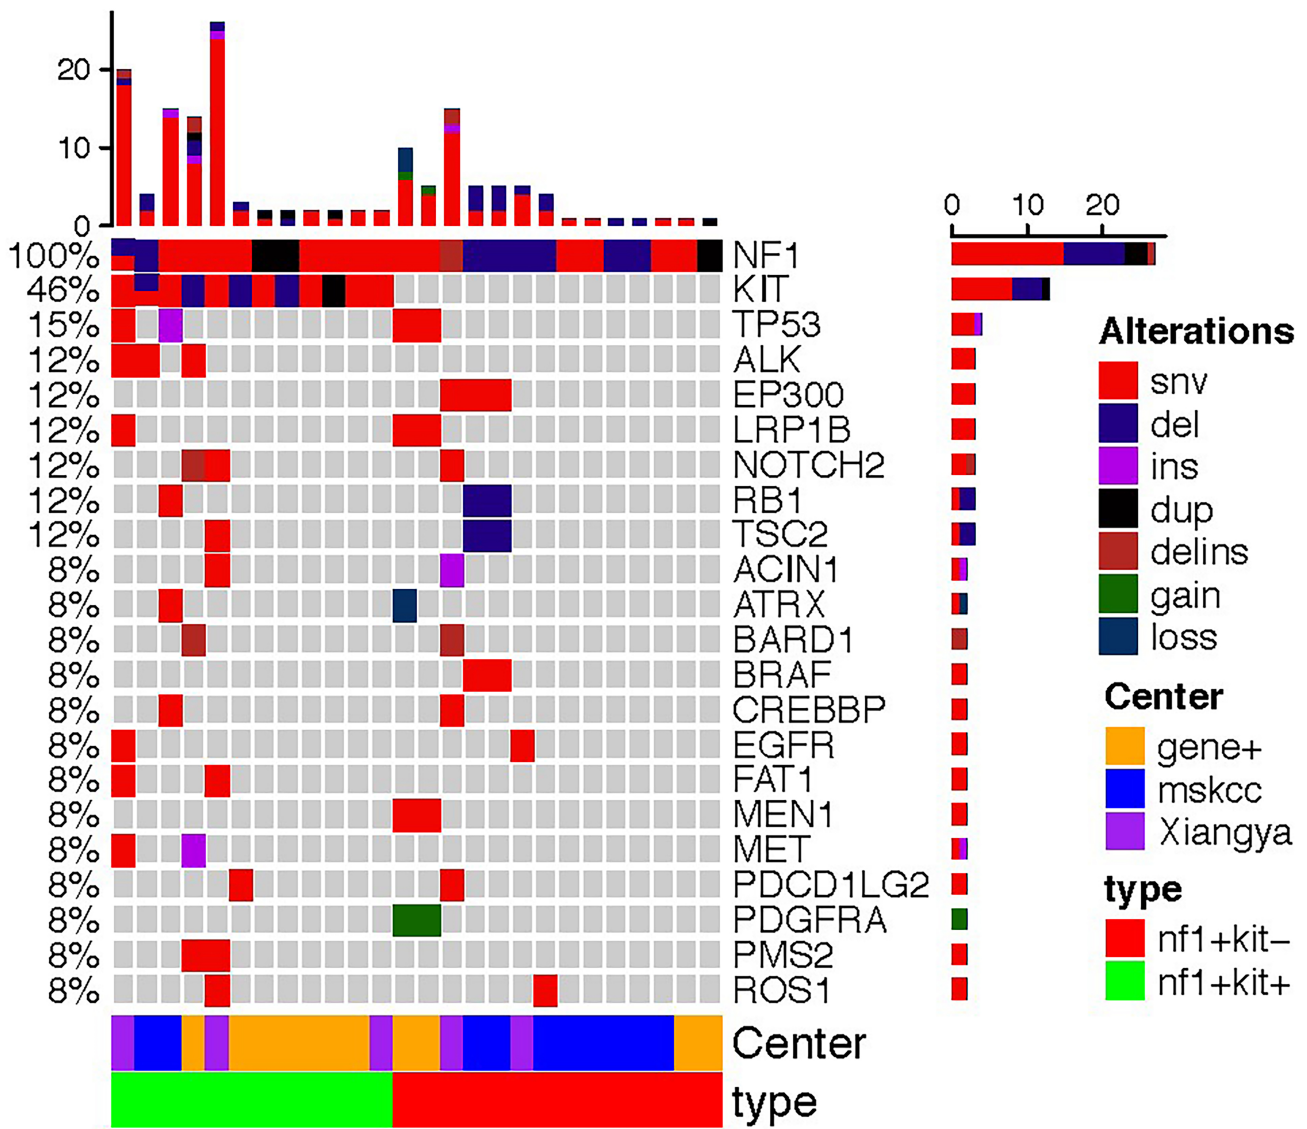

**Supplementary 1** The genomic landscape of NF1-associated GISTs.

**Notes:** In NF1-associated GISTs, the most concurrent gene mutation was KIT (46%), followed by the mutation of the TP53 gene (15%) and NOTCH2, RB1, and TSC2.

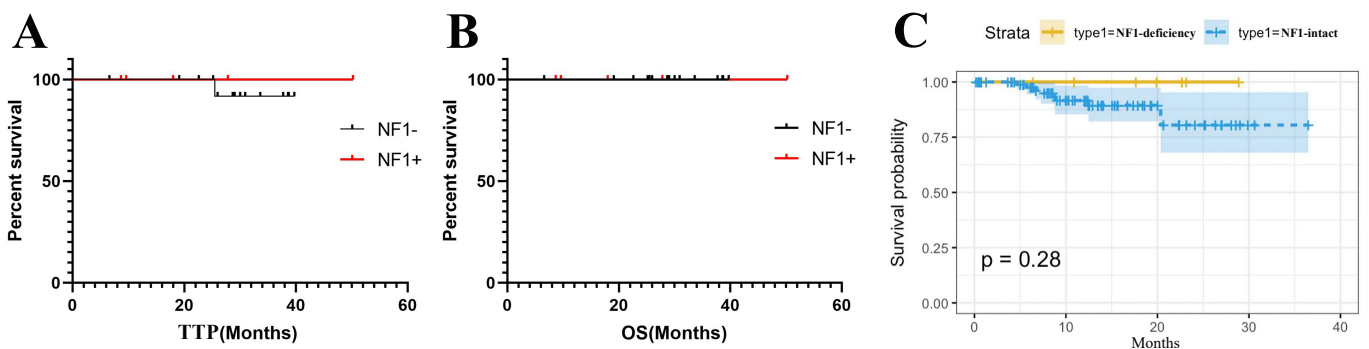

**Supplementary 2** Survival curves in NF1-intact and NF1-deficient GISTs.

**Notes:** Only one patient with a wild-type NF1 genotype had a relapse. All the other patients recruited from our center (A-B) still have stable disease. In the MSKCC dataset (C), the difference of OS between NF1-intact and NF1-deficient GISTs had no statistical significance, albeit the former showing a tendency of shorter OS.
